# Supplementary material
Source: publisher site journal article supplement (https://www.dovepress.com/article/289176)
Supplement: Supplementary file 1 [file get_supplementary_file.php]

**MEDLINE Search Strategy:**

| **#** | **Searches** | **Results** |
| --- | --- | --- |
| 1 | exp Change Management/ | 104 |
| 2 | change management.mp. | 1582 |
| 3 | change leadership.mp. | 56 |
| 4 | PROSCI.mp. | 0 |
| 5 | ADKAR.mp. | 7 |
| 6 | ("Aware Desire Knowledge Ability" or clinical redesign* or system* redesign*).mp. | 363 |
| 7 | Kotter.mp. | 41 |
| 8 | Lewin.mp. | 282 |
| 9 | or/1-8 | 2293 |
| 10 | exp "Delivery of Health Care"/ | 1091534 |
| 11 | healthcare.mp. | 251605 |
| 12 | health care.mp. | 806246 |
| 13 | exp Public Health/ | 7942248 |
| 14 | public health.mp. | 333231 |
| 15 | exp hospitals/ | 277405 |
| 16 | hospital*.mp. | 1624689 |
| 17 | exp Primary Health Care/ | 161952 |
| 18 | primary health care.mp. | 93311 |
| 19 | Family Practice/ | 65312 |
| 20 | family medicine.mp. | 11101 |
| 21 | exp Community Health Services/ | 306181 |
| 22 | community health services.mp. | 32550 |
| 23 | General Practice/ | 13508 |
| 24 | general practice.mp. | 48578 |
| 25 | or/10-24 | 9575954 |
| 26 | 9 and 25 | 1663 |
| 27 | limit 26 to english language | 1627 |
| 28 | limit 27 to yr="2009 -Current" | 1233 |
